# Supplementary material for: Engineering considerations for practical lithium–air electrolytes
Source: Royal Society of Chemistry journal article supplement (doi:10.1039/d3fd00091e), 2023-08-01
Supplement: d3fd00091e2.zip [file d3fd00091e2.zip]

## Sheet: Sheet1
Results of particular importance
Other&intermediate calculations
Input cells	Other cells can be modified but take care as this can break other calculations!
Cell design										O2 Pressurisation (turbo charger)			Pressure vessel			Hansen solubility parameters - Data from M. Díaz de los Ríos and E. Hernández Ramos, SN Appl. Sci., 2020, 2, 676.
	Density (kg/m3)	Mass (g)	Volume (mL)	Thickness (um)	Notes					O2 fraction in air	0.21		For cell pressure				Dispersion	Polarity	H-bonding	R	E Vap	Conc
Copper	8960	1.2	0.133929	1.5	Li current collector					O2 utilisation	0.5		Material density (kg/m3)	7900		Target	6.7	0	3.8	0	7.7026	10.3125
Lithium	530	2.33048	4.39712	49.2478	Anode material					Pressure ratio	20		Max working stress	275		Test	8.17975	0	13	9.6643	15.3593	0.715274
Separator	855	0.51529	0.602679	6.75	Values are for separator material only, does not include pores	Porosity	0.55	Volume (incl. pores)		Gamma	1.4		Shape factor	2		O2	6.7	0	3.8	0	7.7026	10.3125
Carbon	2100	3.75	1.78571	20	Cathode material - Values are for cathode material only, does not include pores	Porosity	0.8	Volume (incl. pores)		Temperature air (K)	298		Safety factor	2		CO2	15.6	5.2	5.8	18.6515	17.4367	0.100095
Aluminium	2700	0.361607	0.133929	1.5	Carbon current collector					Moles of O2 gas considered	1		Vessel mass (g)	3.63703		H2O	15.5	16	42.3	45.2549	47.8073	0.000157522
Electrolyte in pores	1100	8.66741	7.87946	88.25						Turbine efficiency	0.8		Vessel density	229.818		Perfluorobutane	10.6	0	0	8.6764	10.6	1.26871
Electrolyte excess	1100	0.982143	0.892857	10	Electrolyte not in pores of separator or carbon					Adiabatic compression			Mass increase %	0.185583		Perfluoropentane (PFC 5050)	11.3	0	0	9.95389	11.3	0.916264
Oxygen		3.5819	-0.686158	-7.68497	Oxygen in Li2O2 at full discharge					T output gas (K)	701.357		For O2 storage			HFC-43-10mee	11.6	0	0	10.5109	11.6	0.796377
Casing	7850	2.63762	0.336002	3.76322						Alpha	2.5		O2 pressure	300		OS-30 (Decamethyltetrasiloxane)	11.7	2.4	0	10.9636	11.9436	0.705021
Total (discharge)	1552.54	24.0264	15.4755	173.326	Average Wh/kg	701.581				Work done compression (J)	99812.8		Material density (kg/m3)	1580		Perfluoroheptane	12	0	0	11.2606	12	0.660322
Total (half discharge)	1405.65	22.2355	15.8186	177.169	Average Wh/L	986.18				Work out turbine (J)	57172.8		Max working stress	500		Perfluorohexane (PFC 5060)	12.1	0	0	11.449	12.1	0.630082
Total (charge)	1265	20.4445	16.1617	181.011	kg/L	1.40565				Cell energy out (J)	501722		Shape factor	2		OS-20 (Octamethyltrisiloxane)	12.2	1.8	0	11.7762	12.3321	0.57817
Total (charge, excluding case)	1125.19	17.8069	15.8257	177.248						Lost energy (no recovery)	0.198941		Safety factor	2		Perfluoro Dimethylcyclohexane	12.4	0	0	12.0167	12.4	0.547391
Carbon (mAh/g)	1600				Pore fill	0.311246				Lost energy (w/ turbine)	0.0849874		Vessel mass	3.50561		Perfluoromethylcyclohexane	12.4	0	0	12.0167	12.4	0.547391
Discharge voltage (V)	2.6	Average over discharge			Pore space	7.14286				Isothermal compression - intercooled			Vessel density	379.2		1,2-Dichlorotetrafluoroethane (Freon 114)	12.6	1.8	0	12.5268	12.7279	0.480411
Cell capacity (Ah)	6				Li2O2/g	5.13555				Work done compression (J)	88364.2		Mass increase due to tank %	0.178877		OS-10 (Hexamethyldisiloxane)	12.6	2	0	12.5571	12.7577	0.476324
Cell energy (Wh)	15.6				Li2O2/mL	2.22318				Work out turbine (J)	50615		Mass increase due to O2 %	0.091385		Octamethylcyclotetrasiloxane	12.8	1.3	1	12.5845	12.9047	0.468264
Excess Li	1.5	1 is stoichiometric, 1.5 is 50% more etc.			Electrolyte mass fraction	0.433971				Lost energy (no recovery)	0.176122		Mass increase total %	0.270262		Decamethylcyclopentasiloxane	12.9	1.3	1	12.7785	13.0038	0.446601
Carbon thickness (um)	100	Including pores								Lost energy (w/ turbine)	0.0752392					Chlorodifluoromethane (Freon 22)	12.3	6.3	5.7	12.99	14.9489	0.372032
Separator thickness	15	Including pores								Heat load (J)	88364.2					1-Butene	13.2	1.3	3.9	13.0652	13.8253	0.396119
Li2O2 density (kg/m3)	2310									Adiabatic compression + cooling			Electrolyte evaporation			Propane	13.1	0	0	13.3522	13.1	0.394205
Casing (g/mL)	6									Work done compression (J)	99812.8		Discharge pressure (bar)	20		HCFC 225cb	13.1	2.9	1	13.4198	13.4544	0.378547
										Work out turbine (J)	24292.2		Charging O2 pressure (bar)	10		Propylene	13.3	1.6	1.5	13.4941	13.4796	0.372134
										Lost energy (no recovery)	0.198941		Charging total pressure (bar)	20		HFE 8200	13	4	1	13.513	13.6382	0.366388
Carbon										Lost energy (w/ turbine)	0.150523		Acceptable electrolyte loss	0.2		HFE 7000	13	4.2	1	13.5735	13.6982	0.360291
Surface area to volume (m2/g)	62									Temperature air out (K)	126.617		Cycles till electrolyte top up	100		HFE 7500	13.3	2	1	13.6411	13.4867	0.360911
Carbon width (nm)	15.361	Assuming 2D stacked structure								Heat load (J)	111790		Electrolyte/O2 diffusion ratio	0.1		HFE 7100	13.7	2.2	1	14.4458	13.9115	0.296755
Carbon radius (nm)	23.0415	Assuming isolated spherical particles								Equivalent overpotential	0.579315		Electrolyte RFM	137		1-Pentene	13.9	1.4	3.8	14.4679	14.4779	0.283856
Li2O2 crystal size (nm)	19.1242	Assuming uniform coating on 2D stack											Mol of O2	0.111932		HFC 338pcc	13.7	0	0	14.5066	13.7	0.29761
g Li2O2/g carbon	1.36948												Mol of air needed discharge	0.954088		3-Methyl-1-Butene	14	1.4	3.8	14.667	14.5739	0.270725
Carbon (mAh/g)	1599.97	Uses g Li2O2/g carbon in case this is being varied independently											Mol of gas released charge	0.223864		Hexafluoro-1,3-Butadiene	13.8	0	0	14.6997	13.8	0.284002
													Vol of air discharge (m3)	0.00118198		Isopentane	13.8	0	0	14.6997	13.8	0.284002
													Vol of gas charge (m3)	0.000277336		Methane (Liquid B.P.)	14	0	0	15.0864	14	0.258636
O2 Diffusion					Pumping				D E5	C (mM1bar)	DC		Total gas per cycle	0.00145932		2,2,4-Trimethylpentane	14.1	0	0	15.2801	14.1	0.246822
Depth of discharge	1				Viscosity factor (multiples elec. Evap. Number)	1		DME	7.43	10	7.43e-08		Mol of solvent lost	0.0140869		Butane	14.1	0	0	15.2801	14.1	0.246822
C rate	0.25				Cathode length new (um)	200		G2	2.95	7.1	2.0945e-08		Acceptable partial pressure (Pa)	2391.77		Tetraethylorthosilicate	13.9	4.3	0.6	15.3652	14.5623	0.234856
e- process	2	Even if this is changed Li2O2 is assumed to be the discharge product elsewhere			Flow velocity factor	2		G3	2.38	5	1.19e-08		T boil (K)	403.95		HCFC-225ca:cb (45:55)	14.1	3.2	1	15.3987	14.4931	0.234366
Grain diameter	1e-07	Kozeny-Carman equation			O2 concentration (mM)	3.5		G4	1.23	4.3	5.289e-09		Viscosity (mPa.S)	0.553009		Trichlorosilane	14.2	3.6	3.8	15.426	15.1341	0.223191
Sphericity	1				Dissolved O2 usage	0.5		C6F14	7.3	20.6	1.5038e-07		Molar volume (m3/mol)	0.000124545		Methyl Ethyl Ether	14	4.7	6	15.4948	15.9402	0.208937
mA/g	400	τ	1.2245		Flow velocity (m/s)	0.000202539		C10F18	2.25	16.1	3.6225e-08					Vinyl Trifluoro Acetate	13.9	4.3	7.6	15.5013	16.4152	0.202623
mgc/cm2	4.2	Permeability (m2)	4.61004e-17		Pressure drop (Pa)	485923		G2+1M LiTFSI	1.78	5.9	1.0502e-08					Lauryl Methacrylate	14.4	2.2	5.1	15.6106	15.4341	0.210737
mA/cm2	1.68	Permeability (m2)	1.02674e-16		Energy required to pump (J/m3 fluid)	485923		Tetramethylene sulfone		1.57192			Conductivity - Assumes Nernst-Einstein			Vinyl Trimethyl Silane	14.5	1	2.5	15.686	14.7479	0.217163
Porosity (%)	0.551003				Energy out from dissolve O2 (J/m3 fluid)	878014		Ethylene carbonate		1.682			Li+ diffusivity (m^2/s)	3e-11		2-Butene (Trans)	14.6	0	2.9	15.8256	14.8852	0.209097
J0 (mol O2/cm2/s)	8.70602e-09	Surface flux of O2			Energy in/Energy out	0.553434		DMSO		1.83171			Transference number Li+	0.4		Bromotrifluoromethane (Freon 1381)	14.3	2.4	0	15.8506	14.5	0.213559
J0 (mol O2/m2/s)	8.70602e-05				Power (W/m3 fluid)	889160		PC		3.16146			Li+ concentration (M)	0.2		Diethyl Ether	14.5	2.9	4.6	15.8874	15.4861	0.198457
DC (mol O2/m/s)	4.35301e-09				DC (mol O2/m/s)	1.90455e-08		NMP		3.17467			Separation factor (multiples separator thickness)	5		Isobutylene	14.5	2	1.5	15.895	14.7139	0.208549
DC (mol O2/m/s)	7.90015e-09	With accounting for porosity			Reynolds number (<1 for dacy to apply)	0.0805748		G4		4.37232			Tortuosity factor	10		2-Methyl-1-Butene	14.5	1.8	1.3	15.9013	14.669	0.208919
DC (mol O2/m/s)	9.67372e-09	Accounting for tortuosity			Note Reynolds likely overestimate as uses full length			G3		4.64091			Sand time (s)	86.3515		Diethyl ether (ethoxyethane)	14.5	2.9	5.1	15.9204	15.6419	0.195157
								DMC		7.18593			Sand capacity (mAh/cm2)	40.2973		Butyl Stearate	14.5	3.7	3.5	16.0356	15.3685	0.194002
								DEC		7.80677			Limiting current (mA/cm2)	2.57293		2-Butene (Cis)	14.7	1.3	4.1	16.0555	15.3163	0.193869
Diffusivity - Calculates independently								EMC		7.83759			j/FcD	290.201		Pentane	14.5	0	0	16.0562	14.5	0.204758
Viscosity (Pa.s)	0.005							THF		8.70941			-ve ion diffusion	4.5e-11		1-Hexene	14.7	1.1	3	16.0577	15.0433	0.1973
Radius (m)	1.5e-09							DME		9.43593			Conductivity ohm.m	0.0563584		Isoprene (2-Methyl-1,3-Butadiene)	14.7	1.4	4.1	16.0639	15.3251	0.193425
Temperature (K)	298							0.5M LiPF6 PC:DME (1:2)	2.81176	5.36303	1.50796e-08		Resistivity (mS/cm)	177.436		Ethyl Butyl Ether	14.5	3.9	4.7	16.1053	15.7337	0.186814
Diffusivity (m^2/s)	2.91104e-11							1M LiPF6 PC:DME (1:1)	0.7	3.46527	2.42569e-09		iR drop	7.10116e-05		2-Methyl-2-Butene	14.7	2	2.9	16.1496	15.1162	0.192689
																Trimethyl Amine	14.6	3.4	1.8	16.285	15.0983	0.187645
								Data in above table is from:								Diisopropylamine	14.8	1.7	3.5	16.2917	15.3029	0.184881
								J. Read, K. Mutolo, M. Ervin, W. Behl, J. Wolfenstine, A. Driedger and D. Foster, J. Electrochem. Soc., 2003, 150, A1351.								Fluoroprene	14.2	5.8	1	16.3242	15.3714	0.182837
								A. Schürmann, R. Haas, M. Murat, N. Kuritz, M. Balaish, Y. Ein-Eli, J. Janek, A. Natan and D. Schröder, Journal of The Electrochemical Society, 2018, 165, A3095–A3099.								Vinyl Isopropyl Ether	14.7	3.5	5.2	16.4381	15.9806	0.171816
								R. Haas, M. Murat, M. Weiss, J. Janek, A. Natan and D. Schröder, J. Electrochem. Soc., 2021, 168, 070504.								2-Ethyl-1-Butene	14.9	1.7	3.5	16.4906	15.3997	0.17639
																1,1,2-Trichlorotrifluoroethane (Freon113)	14.7	1.6	0	16.5227	14.7868	0.182497
																1,3-Butadiene	14.8	2.8	5.6	16.5384	16.0698	0.167387
																Ethyl Isopropenyl Ether	14.8	3.5	5.1	16.6247	16.0406	0.164758
																Acetonemethyloxime	14.7	4.6	4.6	16.6673	16.0751	0.162974
																1-Heptene	15	1.1	2.6	16.6796	15.2634	0.171211
																Diethyl Amine	14.9	2.3	6.1	16.7194	16.2638	0.159375
																Ethylene	15	2	3.8	16.72	15.6026	0.166108
																1,3-Pentadiene (Trans)	15	2.5	4	16.7884	15.7242	0.162534
																Methyl-t-Butyl Ether	14.8	4.3	5	16.8039	16.2028	0.157234
																Vinyl Propyl Ether	14.9	3.5	5.2	16.8277	16.1648	0.156838
																1-Methyl Vinyl Methyl Ether	14.8	4.2	5.6	16.8321	16.3719	0.154713
																Hexane	14.9	0	0	16.8345	14.9	0.169913
																Vinyl Ether	14.8	4.2	5.8	16.8547	16.4414	0.153349
																1,2-Butadiene	15	1.7	6.2	16.8585	16.3196	0.154371
																Dibutyl Amine	15	3	4.3	16.8763	15.8899	0.15797
																1,1-Diethoxy Ethane	15	3.4	4	16.9458	15.8921	0.155717
																Dichlorodifluoromethane (Freon 12)	14.9	2	0	16.9529	15.0336	0.164371
																3-Methyl-1,2-Butadiene	15.1	2.5	4.5	16.9994	15.9534	0.153426
																HCFC 225ca	14.9	3.5	1	17.0015	15.3382	0.159513
																Isopropyl Amine (2-Propan Amine)	14.8	4.4	6.6	17.0188	16.7917	0.145189
																Butyl Isopropenyl Ether	14.8	5.3	5	17.0871	16.4964	0.145736
																Ethylene Glycol Di-t-Butyl Ether	14.7	4.1	8.2	17.093	17.3245	0.138603
																Di-n-Propyl Ether	15.1	3.2	3.2	17.1126	15.7636	0.151718
																Isopropyl Ether	15.1	3.2	3.2	17.1126	15.7636	0.151718
																Isobutyl Isobutyrate	15.1	2.8	5.8	17.1488	16.4162	0.144612
																t-Butyl Acetate	15	3.7	6	17.1491	16.5738	0.143228
																Ethyl Acetylene	15.1	3.4	5	17.1825	16.2656	0.144944
																Methyl Ethyl Ketoxime	14.7	4.9	7.8	17.2049	17.3476	0.135282
																Ethyl Vinylether	14.9	4.9	5.6	17.2108	16.6547	0.140743
																Perfluoro Ethylene (Tetrafluoro Ethylene	15.1	0	0	17.2244	15.1	0.154801
																Methyl 1-Propenyl Ether	15	4.3	5.7	17.2528	16.6126	0.139889
																Dipropyl Amine	15.3	1.4	4.1	17.2595	15.9016	0.145946
																2-Ethyl-1,3-Butadiene	15.3	1.6	3.8	17.2743	15.8458	0.146017
																Allyl Methyl Ether	15	4.3	5.9	17.276	16.6823	0.138646
																1-Octene	15.3	1	2.4	17.2858	15.5193	0.148736
																Allyl Ethylether	15	4.8	5.1	17.3289	16.5545	0.138213
																Vinyl Isobutyl Ether	15.1	4.1	5.1	17.3419	16.4569	0.138663
																Di-n-Butyl Ether	15.2	3.4	3.2	17.347	15.9009	0.143359
																Di-sec-Butyl Ether	15.2	3.5	3.3	17.3638	15.943	0.142492
																Dimethoxymethane	15	1.8	8.6	17.3735	17.3839	0.13042
